# Supplementary material for: Effect of HEAT therapy in patiEnts with type 2 Diabetes mellitus (HEATED): protocol for a randomised controlled trial
Source: HighWire-hosted journal article supplement (doi:10.1136/bmjopen-2022-062122), 2022-07-01
Supplement: bmjopen-2022-062122supp002_data_supplement.pdf [file bmjopen-2022-062122supp002_data_supplement.pdf]

## BELEEGYZŐ NYILATKOZAT MINTAVÉTEL

(18 évnél idősebb cselekvőképes/ korlátozottan cselekvőképes/ cselekvőképtelen személy)

### A kutatás azonosító adatai

A kutatás címe: „**Hőterápia hatása a 2-es típusú cukorbetegségben szenvedőkben (HEATED vizsgálat): randomizált, kétkarú klinikai vizsgálat**”

Kutatásvezető: Dr. Hegyi Péter, témavezető, Pécsi Tudományegyetem Klinikai Központ, Általános Orvostudományi Kar, Transzlációs Medicina Intézet, 7624 Pécs, Szigeti utca 12.

A kutatás megkezdéséhez szükséges etikai engedélyt a Nemzeti Népegészségügyi Központ Egészségügyi Igazgatási Főosztálya (NNK EÜIG) adta ki, az alábbi iktatószámmal:

Intézmény: .....

Tájékoztatást végző személy

Név: .....

Beosztás: ..... Munkakör: .....

Résztvevő

Név: ..... Születési hely, idő: .....

TAJ szám: ..... E-mail: .....

Telefonszám: ..... Lakcím: .....

- A csatolt tájékoztatót a mintavételről elolvastam, megértettem, így hozzájárulok ahhoz, hogy:
- a fent említett intézmény megbízottai tőlem – a tájékoztatóban előre meghatározott mennyiségben és minőségben – mintát vegyenek,
- a genetikai mintám és az abból származó adatok anonimizált módon tárolásra kerüljenek,
- a biobankban vagy archivált gyűjteményben elhelyezett adatok tudományos céllal feldolgozásra kerüljenek, és azok szakdolgozatban vagy tudományos írásban, a résztvevők nevének említése nélkül közölve legyenek,
- a genetikai mintám kutatási céllal felhasználásra kerüljenek, továbbá,

- hogy a megfelelő hatóságilag szabályozott ellenőrzés mellett a vizsgálati eredmények és a minták más hazai vagy külföldi kutatókhoz továbbítva legyenek, akik ezeket előre meghatározott kutatásfejlesztési célra felhasználhatják, valamint ahhoz, hogy
- a kutatási célú genetikai vizsgálat eredménye - amennyiben az rám vagy hozzátartozóimra nézve egészségügyileg fontos információt tartalmaz - és a kutatás kapcsán elérhetőségeim valamelyikén a vizsgálat munkatársai megkeressenek.

Ezennel kijelentem, hogy önként döntöttem a mintavétel és mintáim biobankban történő elhelyezése mellett.

Tudatában vagyok, hogy e hozzájárulás önkéntes, amelyet szóban vagy írásban bármikor visszavonhatok.

A jelen nyilatkozatban foglaltakat megértettem, tudomásul vettem és aláírással hitelesítem.

Dátum: .....

.....

**tájékoztatót végző orvos aláírása**

**résztevő aláírása**

Amennyiben a vizsgálatba bevonni kívánt személy, illetve a korlátozottan cselekvőképes vagy cselekvőképtelen személy esetén a törvényes képviselő nem tud olvasni, két tanú együttes jelenlétét kell biztosítani a beleegyező nyilatkozathoz szükséges tájékoztatás megadásánál. A tanúk aláírásukkal igazolják, hogy a bevonni kívánt személy, illetve törvényes képviselője számára minden lehetséges információt megadtak, és a bevonni kívánt személy illetve törvényes képviselője önkéntesen és befolyásolástól mentesen adta meg a beleegyező nyilatkozatát.

.....

1. tanú

.....

2. tanú

.....

lakcím

.....

lakcím

.....

személyigazolvány száma

.....

személyigazolvány száma

## BELEEGYZŐ NYILATKOZAT

(18 évnél idősebb cselekvőképes/ korlátozottan cselekvőképes/ cselekvőképtelen személy)

### A kutatás azonosító adatai

A kutatás címe: „**Hőterápia hatása a 2-es típusú cukorbetegségben szenvedőkben (HEATED vizsgálat): randomizált, kétkarú klinikai vizsgálat**”

Kutatásvezető: Dr. Hegyi Péter, témavezető, Pécsi Tudományegyetem Klinikai Központ, Általános Orvostudományi Kar, Transzlációs Medicina Intézet, 7624 Pécs, Szigeti utca 12.

A kutatás megkezdéséhez szükséges etikai engedélyt a Nemzeti Népegészségügyi Központ Egészségügyi Igazgatási Főosztálya (NNK EÜIG) adta ki, az alábbi iktatószámmal:

**Intézmény:**

**Tájékoztatást végző személy**

**Név:** .....

**Beosztás:** ..... **Munkakör:** .....

**Résztvevő**

**Név:** ..... **Születési hely, idő:** .....

**TAJ szám:** ..... **E-mail:** .....

**Telefonszám:** ..... **Lakcím:** .....

1. Elolvastam és megértettem a tájékoztató adatlapot, lehetőségem volt kérdéseket feltenni és azokra mindenben kielégítő választ kaptam.
2. Kijelentem, hogy a vizsgálatban szabad elhatározásomból veszek részt, bármikor szabadon, akár szóban, akár írásban visszaléphetek és ez sem a kezelésemet, sem a jogaimat nem fogja befolyásolni.
3. Tudomásul veszem, hogy a rám vonatkozó orvosi feljegyzések egy részébe a vizsgálatban résztvevő személyek betekintenek, ehhez hozzájárulok.
4. Beleegyezem, hogy a vizsgálatához történő adatgyűjtés során a rólam nyert adatok, eredmények, nevem és személyi adataim teljes titokban tartásával a későbbiekben tudományos elemzés és szakfolyóiratban publikáció céljára tárolásra, felhasználásra kerüljenek.
5. Tudomásul veszem, hogy a vizsgálatokban való részvételért anyagi juttatásban nem részesülök.

6. Tudomásul veszem, hogy a megfelelő, hatóságilag szabályozott ellenőrzés mellett a vizsgálati eredmények és a minták más hazai és külföldi kutatókhoz továbbíthatók, akik ezeket előre meghatározott kutatási célra felhasználhatják.
7. Hozzájárulok ahhoz, hogy a jövőben a kutatásban résztvevők a megadott elérhetőségiemen megkeressenek, a vizsgálathoz szükséges további információk beszerzése céljából.

Dátum: .....

.....

**tájékoztatást végző orvos aláírása**

**résztevő aláírása**

Amennyiben a vizsgálatba bevonni kívánt személy, illetve a korlátozottan cselekvőképes vagy cselekvőképtelen személy esetén a törvényes képviselő nem tud olvasni, két tanú együttes jelenlétét kell biztosítani a beleegyező nyilatkozathoz szükséges tájékoztatás megadásánál. A tanúk aláírásukkal igazolják, hogy a bevonni kívánt személy, illetve törvényes képviselője számára minden lehetséges információt megadtak, és a bevonni kívánt személy illetve törvényes képviselője önkéntesen és befolyásolástól mentesen adta meg a beleegyező nyilatkozatát.

.....

1. tanú

.....

2. tanú

.....

lakcím

.....

lakcím

.....

személyigazolvány száma

.....

személyigazolvány száma

## BETEGTÁJÉKOZTATÓ

(18 évnél idősebb cselekvőképes/ korlátozottan cselekvőképes/ cselekvőképtelen személy)

### Tisztelt Hölgem/ Uram! Kedves Betegünk!

Kérjük, olvassa el ezt a tájékoztatót, amelyben röviden összefoglaljuk a HEATED vizsgálatunkat, melyhez részvételi hozzájárulását kérjük.

#### A kutatás azonosító adatai

A kutatás címe: **„Hőterápia hatása a 2-es típusú cukorbetegségben szenvedőkben (HEATED vizsgálat): randomizált, kétkarú klinikai vizsgálat”**

Kutatásvezető: Dr. Hegyi Péter, témavezető, Pécsi Tudományegyetem Klinikai Központ, Általános Orvostudományi Kar, Transzlációs Medicina Intézet, 7624 Pécs, Szigeti utca 12.

A kutatás megkezdéséhez szükséges etikai engedélyt a Nemzeti Népegészségügyi Központ Egészségügyi Igazgatási Főosztálya (NNK EÜIG) adta ki, az alábbi iktatószámmal:

#### A kutatás célja és menete

Önnél kezelőorvosai 2-es típusú cukorbetegséget diagnosztizáltak és megfelel azoknak az előzetes feltételeknek, amelyek alapján Ön alkalmas lehet a vizsgálatban való részvételre.

A 2-es típusú cukorbetegség (T2DM) kezelésében több lehetőség áll rendelkezésünkre. A gyógyszeres kezelés mellett az életmódbeli változtatások hasonló fontossággal bírnak. Bizonyított, hogy a sport, a megfelelő diéta, a stressz kerülése javítja a cukorháztartást és kevesebb gyógyszer szedéséhez vezet. A fizikai aktivitáshoz hasonló módon a hőterápia is jótékony hatással bírhat T2DM javulásában. A hőterápia során a maghőmérséklet emelkedése jön létre, mely ún. stresszfehérjék (hősokk fehérje) keletkezését eredményezi. Ezeknek a fehérjéknek több jótékony hatását írták le különböző betegpopulációkban, mint például reumatológiai betegségekben. Hasonló módon a T2DM javulására is vannak adatok különböző hőterápia után, viszont az irodalom nem egyértelmű erre vonatkozóan.

A kutatásunk célja a hőterápia vizsgálata T2DM-ben. Hipotézisünk szerint a hőterápia kiegészítő kezelés tud lenni a gyógyszeres terápia mellett. Ez előnyt jelenthet olyan kórcsoportokban, ahol nem megvalósítható a rendszeres intenzív fizikai aktivitás, megfelelő diéta. A vizsgálat során olyan információkhoz juthatunk, mely jelen betegség kezelésében jelentős fejlődéshez vezethetnek.

A vizsgálatba összes T2DM miatt kezelt, a vizsgálat beválogatási kritériumainak eleget tevő beteg beleegyezését kérjük a vizsgálatban való részvételhez. A részvétel minden tekintetben önkéntes, arra Önt senki nem kötelezheti, illetve döntésében nem befolyásolhatja.

A vizsgálatban való részvételbe beleegyezni a jelen Betegtájékoztató és a Beleegyező nyilatkozat aláírásával lehet. Önről bármilyen adatot csak a Beleegyező nyilatkozat aláírását követően lehet rögzíteni.

Ha beleegyezik a vizsgálatban való részvételbe, akkor sem kerül sor olyan orvosi beavatkozásra, vizsgálatra vagy soron kívüli ellenőrzésre, melyre egyébként a megfelelő ellátása érdekében nem lenne szükség.

A kérdés megválaszolására egy randomizált, kétkarú vizsgálatot terveztünk. Ez azt jelenti, hogy a résztvevőket véletlenszerűen két csoportra osztjuk. Az A csoportban a résztvevők 39 °C-os, míg a B csoportban 30-32 °C-os termálvizes kezelésben részesülnek. Erre az elrendezésre azért van szükség, mert hasonlításként elengedhetetlen egy kontroll csoport használata. A B csoportban használt vízhőmérséklet termoneutrálisnak számít, amit azt jelenti, hogy nem emeli a szervezet belső hőmérsékletét. Mindkét csoportban a fürdő fél órát tart és legfeljebb heti 5 alkalommal ismételhető. A vizsgálat mindkét csoportban 12 hétig tart, mivel a cukorháztartásban a változások pár hét után következnek be. Ebben a vizsgálatban körülbelül 130 olyan férfi és nő vesz majd részt, akik T2DM kezelésben részesülnek.

A termálvizes kezelésekre a Harkányi Termál Rehabilitációs Centrumban kerül sor.

A kezelések megkezdése előtt ellenőrzik, hogy Ön alkalmas-e a vizsgálatban való részvételre. Miután aláírta a betegtájékoztatót és beleegyező nyilatkozatot, megkezdődik a gyógykezelés randomizálása (véletlenszerű kiválasztása), ami azt jelenti, hogy a számítógépes program által kiválasztott sorszámot és kezelést fogja kapni. A véletlenszerűen kiválasztott terápiás csoportok közül Ön kerülhet abba a csoportba, akiknél a 39 °C-os vagy a 30-32°C termálvizes kezelést használják.

Felvételkor Önnek a kezelőorvosa kérdéseket tesz fel korábbi betegségeire, jelenlegi panaszaira, tüneteire vonatkozóan. Megméri a testsúlyát, magasságát, vérnyomását, egyéb fontos paramétereit, valamint laboratóriumi vizsgálatokat végeznek. Ezen felül kivizsgálásra kerül a T2DM. A vizsgálat során a felvételkor elvégzett kivizsgálásokat megismételjük a 4., 8. és 12. héten, ezzel információt nyerünk a vizsgált paraméterek változásáról a kiinduló értékekhez képest. Minden kivizsgáláskor beleegyezés mellett vér és/vagy izomszövet gyűjtésére kerül sor. A vérmintákat a fent leírt időintervallumokban gyűjtjük, ezzel szemben az izomszövet gyűjtésére szolgáló biopsziára a vizsgálat indulásakor és az utolsó fürdő lejártaival kerül sor.

A vizsgálat során rendszeres orvosi megfigyelés alatt vannak a résztvevők, ezzel elkerülve a lehetséges szövődményeket. Szövődményként a melegvízre való túlérzékenység jelenhet meg, továbbá a hő hatására vérnyomásesés következhet be. Ezek kivédésére folyamatos megfigyelés alatt vannak a résztvevők.

A vizsgálat lezártaival a fent említett kivizsgálások és adatrögzítésre kerül sor.

### **Lehetséges és várható következmények**

Az Ön betegségének diagnózisára, kezelési tervére, gyógyulási idejére a tervezett kutatás nincs hatással, attól teljesen független, azonban fontos új információkkal szolgálhatnak a jövőben a betegség megállapításában és kezelésében egyaránt. Az adatrögzítéssel kapcsolatban várható kockázatok és kellemetlenségek Önt nem terhelik, a kutatásból kifolyólag előre nem látható események fellépésére nem kell számítania.

### **Kockázatok és esetleges kár enyhítésének módja**

Tekintettel arra, hogy a részvétel nem befolyásolja a betegellátás folyamatát, Ön kísérleti kezelést nem kap, illetve nem történik olyan vizsgálat, ami a gasztroenterológiai/sebészeti szakterületen ne lenne már ismert, a részvételnek specifikus kockázata nincs. A normál betegellátás folyamán fellépő kérdésekben a Pécsi Tudományegyetem Klinikai Központjának Betegjogi képviselője tud segítséget nyújtani.

### **Költségtérítés**

A kutatásban való részvételért a vizsgálatban lévő betegek juttatásban nem részesülnek.

### **Adatkezelés**

A vizsgálat során rögzítjük a vizsgálat alatti és az azt követő klinikai adatokat, melyeket természetesen az orvosi titoktartásnak megfelelően bizalmasan kezelünk. A felmérésből készülő tanulmányokban az adatok név nélkül, összesített formában fognak szerepelni, azokból az egyes személyekre visszakövetkeztetni nem lehet. Ön minden tekintetben anonim marad és az adatkezelés a személyes adatok kezeléséről és védelméről szóló törvény alapján történik.

Az adatvédelemben irányadó hatályos jogi szabályozások Az Európai Parlament és a Tanács a természetes személyeknek a személyes adatok kezelése tekintetében történő védelméről és az ilyen adatok szabad áramlásáról, valamint a 95/46/EK rendelet hatályon kívül helyezéséről szóló 2016/679 rendelete európai szinten szabályozza a magánszemélyek személyes adatainak kezelését és védelmét. 2011. évi CXII. törvény az információs önrendelkezési jogról és az információszabadságról, a 2018. július 01-től hatályos módosítással. 1997. évi XLVII. törvény az egészségügyi és a hozzájuk kapcsolódó személyes adatok kezeléséről és védelméről.

A vizsgálatban gyűjtött adatok kezelője a Pécsi Tudományegyetem. Az egyetem adatvédelmi tisztviselője Dr. Szőke Gergely László, e-mail: [adatvedelem@pte.hu](mailto:adatvedelem@pte.hu), Tel.: (72) 501 599 / 23321 mellék. Az egyetem egészségügyi adatvédelmi tisztviselője Dr. Románcz Erzsébet, e-mail: [romancz.erszebet@pte.hu](mailto:romancz.erszebet@pte.hu), Tel.: (72) 533 133 / 33018 mellék.

A PTE az adatkezelő szerződésben meghatározott feltételekkel további adatfeldolgozókat vehet igénybe az adatok elektronikus tárolására és a GDPR szabályainak betartásával történő adattovábbításra. Az etikai engedély beadásakor az alábbi két adatfeldolgozó vesz részt a fenti folyamatokban:

- 1) Transzlációs Medicina Alapítvány, 6725 Szeged, Pálfy u. 52/d.
- 2) Digital Kft., 6723 Szeged, Csongrádi sgt. 83.

Adatkezeléssel kapcsolatban panaszt nyújthat be az adatvédelmi felügyeleti hatósághoz, illetve adatkezelési jogainak megsértése esetén bírósághoz fordulhat. Magyarországon az adatvédelmi felügyeleti hatóság a Nemzeti Adatvédelmi és Információszabadság Hatóság (1125 Budapest, Szilágyi Erzsébet fasor 22/C; telefonelérhetőség: 06-1- 391-1400, e-mail: [ugyfelszolgalat@naih.hu](mailto:ugyfelszolgalat@naih.hu), weboldal: [www.naih.hu](http://www.naih.hu)).

### **Beleegyezés**

Természetesen amennyiben Ön nem szeretne a kutatásban részt venni, akkor döntését tiszteletben tartjuk és megnyugtatójuk, hogy ez a további kezelésére, illetve az Önnel való bánásmódra semmilyen hatással nem lesz. Önnek bármikor lehetősége van a vizsgálat

menetéről, eredményéről érdeklődni a kutatás vezetőjénél, akinek elérhetőségéről tájékoztatást kap.

Amennyiben az említett vizsgálatokkal kapcsolatban kérdése lenne, úgy kérem, forduljon kezelőorvosához bizalommal. A későbbiekben, ha szeretné tudni a vizsgálatok menetét és a kutatási projekt előrehaladását, úgy érdeklődjön Dr. Péterfi Zoltánál ([peterfi.zoltan@pte.hu](mailto:peterfi.zoltan@pte.hu)) vagy kezelőorvosánál.

A tájékoztatót elolvastam és megértettem, a kérdéseimre megfelelő válaszokat kaptam. A tájékoztató egy példányát átvettem.

Dátum: .....

A tájékoztatót végző orvos aláírása: .....

A tájékoztatót végző orvos neve: .....

Dátum: .....

A résztvevő aláírása: .....

A résztvevő neve: .....

Amennyiben a vizsgálatba bevonni kívánt személy, illetve a korlátozottan cselekvőképes vagy cselekvőképtelen személy esetén a törvényes képviselő nem tud olvasni, két tanú együttes jelenlétét kell biztosítani a beleegyező nyilatkozathoz szükséges tájékoztatás megadásánál. A tanúk aláírásukkal igazolják, hogy a bevonni kívánt személy, illetve törvényes képviselője számára minden lehetséges információt megadtak, és a bevonni kívánt személy illetve törvényes képviselője önkéntesen és befolyásolástól mentesen adta meg a beleegyező nyilatkozatát.

.....

1. tanú

.....

lakcím

.....

személyigazolvány száma

.....

2. tanú

.....

lakcím

.....

személyigazolvány száma

## BETEGTÁJÉKOZTATÓ MINTAVÉTEL

(18 évnél idősebb cselekvőképes/ korlátozottan cselekvőképes/ cselekvőképtelen személy)

**Tisztelt Hölgem/ Uram! Kedves Betegünk!**

Kérjük, olvassa el ezt a tájékoztatót, amelyben röviden összefoglaljuk a HEATED vizsgálatunkat, melyhez részvételi hozzájárulását kérjük.

### **A kutatás azonosító adatai**

A kutatás címe: „Hőterápia hatása a 2-es típusú cukorbetegségben szenvedőkben (HEATED vizsgálat): randomizált, kétkarú klinikai vizsgálat”

Kutatásvezető: Dr. Hegyi Péter, témavezető, Pécsi Tudományegyetem Klinikai Központ, Általános Orvostudományi Kar, Transzlációs Medicina Intézet, 7624 Pécs, Szigeti utca 12.

A kutatás megkezdéséhez szükséges etikai engedélyt a Nemzeti Népegészségügyi Központ Egészségügyi Igazgatási Főosztálya (NNK EÜIG) adta ki, az alábbi iktatószámmal:

Az Ön kezelőorvosa az ellátásért felelős intézménnyel közösen egy együttműködésben vesz részt. Kérjük, olvassa el figyelmesen az alábbiakat és amennyiben nincs ellenére, megkérnénk, hogy vér- és/vagy izombiopsziás minta adásával járuljon hozzá kutatási erőfeszítéseinkhez, mellyel Önökön, betegeken kívánunk segíteni. Természetesen amennyiben Ön nem szeretne mintát adni, akkor döntését tiszteletben tartjuk és megnyugtatóan meggyőzzük, hogy ez a további kezelésére, illetve az Önnel való bánásmódra semmilyen hatással nem lesz.

A mintavétel célja, hogy megértsük az Ön betegségének kialakulását, lefolyását és az alkalmazott kezelés hatását. Kutatásaink során olyan információkhoz juthatunk, melyek betegségének megállapításában és kezelésében jelentős fejlődéshez vezethetnek.

### **Előnyök és kockázatok**

A kutatásban való részvételtől sem hátránya, sem előnye nem származik. A vizsgálatban való részvétel teljesen önkéntes, nem jár fájdalommal.

### **Mintavétel**

A betegétől történő mintavételt az Eü. M. 23/2002 rendelet 3.§.4. pontja ajánlását követve úgy terveztük, hogy a mintavétel Önnek plusz orvosi beavatkozást ne jelentsen.

### **Vér**

A vérvétel során 3db cső (kevesebb, mint 25 ml) plusz vért vennénk le. Mivel kezelőorvosa a normál betegellátás részeként vérvételt rendelt el Önnek, ezért ez plusz szúrást Önnek nem jelentene, fájdalommal nem jár. Önre vonatkozóan semmilyen egészséget károsító hatása

nincs. Egy önkéntes véradás során az önkéntesek ennek a vérmennyiségnek kb. negyvenszeresét adják problémamentesen. A vizsgálat során belegeyezés után, továbbá a 4., 8. és 12. héten kerül sor vérvételre.

### **Szövetminta**

Izombiopsziás mintavételre csak az ön belegeyezésével kerül sor. Ez a vizsgálat során kétszer végeznénk el, a belegeyezés után és az utolsó beavatkozás lejárta után. A mintavételezést orvos végzi. Helyi érzéstelenítés után egy 1cm hosszú vágást ejtenek a mintavétel helyén, mely vágásból egy tű segítségével nyerik ki a mintákat. A biopszia helye a combizom. A minta segítségével a szövet szinten történi változásokat tudjuk vizsgálni.

### **Minta- és adattárolás**

A minta minden esetben azonnal egy kódszámot kap, így az Ön neve végig titkosan lesz kezelve, azt csak kezelőorvosa és a kutatást végző orvos ismeri.

A 2008. évi XXI. törvény 23§ alapján a kódolt genetikai mintát, adatot és kódkulesokat mind fizikailag és elektronikusan elkülönítve tároljuk. A 24§ alapján a személyazonosító adatokkal együttesen tárolt, valamint kódolt genetikai mintát, illetve adatot tartalmazó nyilvántartás személyazonosító adatokat tartalmazó nyilvántartással nem kerül összekapcsolásra. A 26§ alapján a biobankban tárolt minden genetikai mintát és adatot, valamint az ezekkel kapcsolatos minden eljárást, tevékenységet a genetikai minta és adat továbbítását az adatfelvételtől számított legalább 30 évig nyilvántartjuk, kivéve, ha az érintett a genetikai adatkezeléséhez adott belegeyezését visszavonja. Visszavonás esetén az érintett tájékoztatását követően valamennyi, a genetikai adatokra vonatkozó nyilvántartást megsemmisítjük.

A kapott mintákat kutatási céllal feldolgozzuk, az ebből kapott eredmények az Ön kezelésére már nem lesznek hatással, azonban a későbbiekben a betegségek gyógyítását elősegíthetik. A vérvételi mintából kutatási – nem diagnosztikus – céllal genetikai vizsgálatot is végzünk. Amennyiben ennek olyan eredménye születne, ami Önre vagy hozzátartozóira nézve egészségügyileg fontos információt tartalmaz, értesíteni fogjuk a megadott elérhetőségei valamelyikén. A vizsgált mintákból kapott eredményeket tudományos céllal dolgozzuk fel és azokat szakdolgozatban vagy tudományos írásban, a résztvevők nevének említése nélkül közöljük. A megfelelő hatóságilag szabályozott ellenőrzés mellett a vizsgálati eredmények és a minták más hazai vagy külföldi kutatókhoz továbbításra kerülhetnek, akik ezeket előre meghatározott kutatási célra felhasználhatják.

A vizsgálatba való belegeyezés önkéntes és befolyásolástól mentes, azt bármikor akár szóban, akár írásban indokolás nélkül vissza lehet vonni anélkül, hogy ebből Önnek hátránya származna.

Amennyiben az említett vizsgálatokkal kapcsolatban kérdése lenne, úgy kérem, forduljon kezelőorvosához bizalommal. A későbbiekben, ha szeretné tudni a vizsgálatok menetét és a kutatási projekt előrehaladását, úgy érdeklődjön Dr. Péterfi Zoltánál ([peterfi.zoltan@pte.hu](mailto:peterfi.zoltan@pte.hu)) vagy kezelőorvosánál.

Dátum: .....

A tájékoztatást végző orvos aláírása: .....

A tájékoztatást végző orvos neve: .....

Dátum: .....

A résztvevő aláírása: .....

A résztvevő neve: .....

Amennyiben a vizsgálatba bevonni kívánt személy, illetve a korlátozottan cselekvőképes vagy cselekvőképtelen személy esetén a törvényes képviselő nem tud olvasni, két tanú együttes jelenlétét kell biztosítani a beleegyező nyilatkozathoz szükséges tájékoztatás megadásánál. A tanúk aláírásukkal igazolják, hogy a bevonni kívánt személy, illetve törvényes képviselője számára minden lehetséges információt megadtak, és a bevonni kívánt személy illetve törvényes képviselője önkéntesen és befolyásolástól mentesen adta meg a beleegyező nyilatkozatát.

.....

1. tanú

.....

2. tanú

.....

lakcím

.....

lakcím

.....

személyigazolvány száma

.....

személyigazolvány száma
