# Supplementary material for: Effect of HEAT therapy in patiEnts with type 2 Diabetes mellitus (HEATED): protocol for a randomised controlled trial
Source: HighWire-hosted journal article supplement (doi:10.1136/bmjopen-2022-062122), 2022-07-01
Supplement: bmjopen-2022-062122supp003_data_supplement.pdf [file bmjopen-2022-062122supp003_data_supplement.pdf]

## Questionnaire A

Institute:  
 Doctor:  
 Blood sample code:  
 Date of blood sampling:

### **1. Patient personal details**

Insurance number: .....

Name: .....

Date of birth: .....

Gender: Female/Male

Race: Caucasian / Black / Asian / Indian/ Other:

Date of questioning: .....

### **2. Inclusion criteria**

|                                                           |     |    |
|-----------------------------------------------------------|-----|----|
| Patient has type 2 diabetes mellitus                      | YES | NO |
| Age: 35 - 75 years                                        | YES | NO |
| Hemoglobin A1c: 7-12%                                     | YES | NO |
| Treated with oral antihyperglycemic agent or with insulin | YES | NO |
| Written informed consent signed                           | YES | NO |
| ONE „NO” is present = DO NOT INCLUDE!                     |     |    |

### **3. Exclusion criteria**

|                                                                                           |     |    |
|-------------------------------------------------------------------------------------------|-----|----|
| Other type of diabetes mellitus                                                           | YES | NO |
| patients with poor glycaemic control or unstable diabetes                                 | YES | NO |
| patients with known serious comorbidity and/ or with advanced macrovascular complications | YES | NO |
| active bacterial infection or treatment with antibiotics within 3 weeks                   | YES | NO |
| open wounds or skin lesions                                                               | YES | NO |
| history of skin-related conditions or sensitivity to prolonged water immersion            | YES | NO |

|                                                                                           |     |    |
|-------------------------------------------------------------------------------------------|-----|----|
| or exposure to pool chemicals                                                             |     |    |
| severe psychiatric pathology or psychosis                                                 | YES | NO |
| pregnancy or breastfeeding                                                                | YES | NO |
| judgment by medical provider that heat therapy/hydrotherapy poses an undue burden or risk | YES | NO |
| participating in other ongoing clinical trials                                            | YES | NO |
| heat or balneotherapy in the past 3 months                                                | YES | NO |
| morbid obesity (body mass index > 40 kg/m <sup>2</sup> )                                  | YES | NO |
| steroid treatment                                                                         | YES | NO |
| active autoimmune diseases                                                                | YES | NO |
| coronavirus disease 2019 (COVID-19) in the past 3 months.                                 | YES | NO |
| One „YES” is present = EXCLUDE!                                                           |     |    |

#### 4. Medical history

**Alcohol consumption** YES / NO

If yes: daily /weekly/ monthly/ occasionally

**Smoking:** YES / NO

If yes: ..... pocket

..... years

If no: .. earlier? YES/NO

If yes: ..... pocket

..... years

**Diabetes mellitus (2):** since.....

**Hypertension:** YES since:.....

NO

#### 5. Physical examination

Height: ..... cm

Body weight:.....kg

BMI: .....kg/m<sup>2</sup>

Blood pressure:..... Hgmm

Heart rate:..... bpm

Blood sugar: ..... mmol/l

## 6. Treatment

### Oral antidiabetic treatment

| NAME | Active substance | Dose (number only) | Unit (g/mg/IU) | Dosage (time/day) | Oral/subcutan | Since when? |
|------|------------------|--------------------|----------------|-------------------|---------------|-------------|
|      |                  |                    |                |                   |               |             |
|      |                  |                    |                |                   |               |             |
|      |                  |                    |                |                   |               |             |
|      |                  |                    |                |                   |               |             |
|      |                  |                    |                |                   |               |             |
|      |                  |                    |                |                   |               |             |
|      |                  |                    |                |                   |               |             |

### Insulin treatment

| NAME | Active substance | Total daily dose | Since when? |
|------|------------------|------------------|-------------|
|      |                  |                  |             |
|      |                  |                  |             |
|      |                  |                  |             |

## 7. Blood sample - routine laboratory examination

|                                                         |  |
|---------------------------------------------------------|--|
| <b>Glycaemic control</b>                                |  |
| Fasting plasma glucose (mmol/l)                         |  |
| Hemoglobin A1c (%)                                      |  |
| Plasma insulin (pmol/l??)- only in OAD treated patients |  |
| <b>Inflammatory markers</b>                             |  |
| CRP (mg/l)                                              |  |
| Erythrocyte sedimentation rate (mm/h)                   |  |
| <b>Blood</b>                                            |  |
| White blood cell count (G/l)                            |  |
| Neutrophils (%)                                         |  |
| Red blood cell count (T/l)                              |  |
| Hemoglobin (g/l)                                        |  |
| Hematokrit (%)                                          |  |
| MCV (fl)                                                |  |
| Platelet count (G/l)                                    |  |

|                                             |  |
|---------------------------------------------|--|
| <b>Ions</b>                                 |  |
| Sodium (mmol/l)                             |  |
| Potassium (mmol/l)                          |  |
| <b>Renal function</b>                       |  |
| Urea nitrogen (mmol/l)                      |  |
| Creatinine (umol/l)                         |  |
| eGFR (ml/min/m <sup>2</sup> )               |  |
| <b>Liver functions</b>                      |  |
| Total bilirubin (umol/l)                    |  |
| Aspartate aminotransferase (ASAT/GOT – U/l) |  |
| Alanine aminotransferase (ALAT/GPT – U/l)   |  |
| Alkaline phosphatase (ALP – U/l)            |  |
| Lactate dehydrogenase (LDH – U/l)           |  |
| Gamma glutamyl transferase (GGT – U/l)      |  |
| Prothrombin (%)                             |  |
| INR                                         |  |
| Total protein (g/l)                         |  |
| Albumin (g/l)                               |  |
| <b>Lipids</b>                               |  |
| Total cholesterol (mmol/l)                  |  |
| Low-density lipoprotein (LDL – mmol/l)      |  |
| High-density lipoprotein (HDL – mmol/l)     |  |
| Triglyceride (mmol/l)                       |  |
| TSH (mU/l)                                  |  |
| <b>Iron status</b>                          |  |
| Iron (umol/l)                               |  |
| Transferrin (g/l)                           |  |
| Transferrin saturation (%)                  |  |
| Ferritin (ug/l)                             |  |
| Thrombocyte aggregation....???              |  |

### 8. Spot urine analysis

Albumin/creatinine ratio (ACR, mg/g): .....

| Fractional excretion of amino acids |  |
|-------------------------------------|--|
|                                     |  |
|                                     |  |
|                                     |  |
|                                     |  |
|                                     |  |
|                                     |  |
|                                     |  |
|                                     |  |

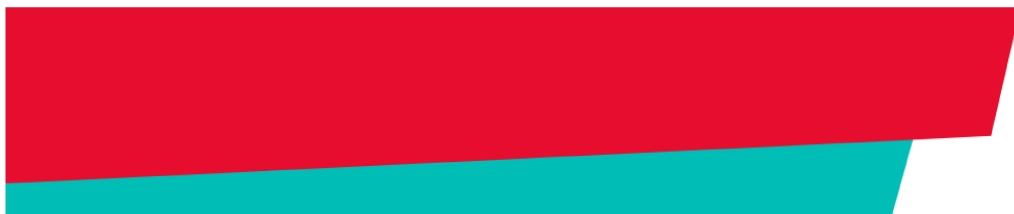

|  |  |
|--|--|
|  |  |
|  |  |

### 9. Oxidative stress markers – blood sample

|                       |  |
|-----------------------|--|
| Ortho-thyrozine level |  |
| Meta-thyrozine level  |  |
| Para-thyrozine level  |  |

### 10. Heat shock proteins – blood sample

Yes            no

### 11. Cardiovascular measurements

| 24 h ambulatory blood pressure monitor                       |             |
|--------------------------------------------------------------|-------------|
| Mean systolic blood pressure (Hgmm)                          |             |
| Mean diastolic blood pressure (Hgmm)                         |             |
| Diurnal index (%)                                            |             |
| - Dipper (10-20%)                                            | YES      NO |
| - Non-dipper (<10%)                                          | YES      NO |
| - Extreme dipper (>20%)                                      | YES      NO |
| - Inversed diurnality                                        | YES      NO |
| Percent time elevation index (or hypertensive time index, %) |             |
| Pulse pressure (Hgmm)                                        |             |

Arterial pulse wave velocity: .....

Overnight pulzoxymeter – apnoe-hypopnoe index (AHI): .....

- AIH > 5:      YES            NO

### 12. Examinations for neuropathy

| Neurometer |             |                        |              |                          |  |             |                        |              |                          |
|------------|-------------|------------------------|--------------|--------------------------|--|-------------|------------------------|--------------|--------------------------|
|            | <u>Left</u> | <u>Nervus medianus</u> | <u>Right</u> | <u>Normal range (Hz)</u> |  | <u>Left</u> | <u>Nervus peroneus</u> | <u>Right</u> | <u>Normal range (Hz)</u> |
|            |             |                        |              |                          |  |             |                        |              |                          |

|                           |  |         |  |                       |  |         |  |                       |
|---------------------------|--|---------|--|-----------------------|--|---------|--|-----------------------|
|                           |  | 2000 Hz |  | <b><u>120-289</u></b> |  | 2000 Hz |  | <b><u>187-516</u></b> |
| <b><u>Abnormal: 1</u></b> |  |         |  |                       |  |         |  |                       |
| <b><u>Normal: 0</u></b>   |  |         |  |                       |  |         |  |                       |
|                           |  | 250 Hz  |  | <b><u>22-180</u></b>  |  | 250 Hz  |  | <b><u>44-190</u></b>  |
| <b><u>Abnormal: 1</u></b> |  |         |  |                       |  |         |  |                       |
| <b><u>Normal: 0</u></b>   |  |         |  |                       |  |         |  |                       |
|                           |  | 5 Hz    |  | <b><u>16-100</u></b>  |  | 5 Hz    |  | <b><u>18-170</u></b>  |
| <b><u>Abnormal: 1</u></b> |  |         |  |                       |  |         |  |                       |
| <b><u>Normal: 0</u></b>   |  |         |  |                       |  |         |  |                       |

| <b>128-Hz tuning fork</b>            |                             |                            |
|--------------------------------------|-----------------------------|----------------------------|
|                                      | <b><u>Right radius:</u></b> | <b><u>Left radius:</u></b> |
| <b><u>Abnormal: 1, Normal: 0</u></b> |                             |                            |
|                                      | <b><u>Right hallux:</u></b> | <b><u>Left hallux:</u></b> |
| <b><u>Abnormal: 1, Normal: 0</u></b> |                             |                            |

| <b><u>Symptoms of neuropathy</u></b>    |              |                                                      |
|-----------------------------------------|--------------|------------------------------------------------------|
|                                         | <b>Score</b> | <b><u>Abnormal: 1</u></b><br><b><u>Normal: 0</u></b> |
| <b>DN4 Questionnaire</b>                |              |                                                      |
| <b>Neuropathy Total Symptom Score-6</b> |              |                                                      |

**Neurotest:**    PINK            MIXED            BLUE  
                          0                    1                    1
